# Supplementary material for: Aerosol indirect effects on the nighttime Arctic Ocean surface from thin, predominantly liquid clouds
Source: Copernicus journal article supplement (doi:10.5194/acp-17-7311-2017), 2017-06-20
Supplement: Supplementary file 1 [file acp-17-7311-2017-supplement.pdf]

Supplement of Atmos. Chem. Phys., 17, 7311–7332, 2017  
<https://doi.org/10.5194/acp-17-7311-2017-supplement>  
© Author(s) 2017. This work is distributed under  
the Creative Commons Attribution 3.0 License.

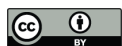

*Supplement of*

## **Aerosol indirect effects on the nighttime Arctic Ocean surface from thin, predominantly liquid clouds**

**Lauren M. Zamora et al.**

*Correspondence to:* Lauren M. Zamora ([lauren.m.zamora@nasa.gov](mailto:lauren.m.zamora@nasa.gov))

The copyright of individual parts of the supplement might differ from the CC BY 3.0 License.

**Supplementary Notes on MOONLiT cloud selection criteria:**

If the MOONLiT criteria were changed to include a) clouds with bases that were 200 m instead of 1 km above the surface, b) clouds above a separate ice cloud, or c) clouds below other non-opaque cloud layers (icy or otherwise), the MOONLiT cloud sample size would respectively have increased by 107 (121), 16 (28), and 303 (617)% over sea ice (open ocean). Any other differences between the MOONLiT cloud subset and the ONLi cloud subset was due to cases where uncertain aerosol CAD scores ( $<70$ ) existed somewhere above or beneath cloud layer of interest. These clouds were allowed in the ONLi cloud subset, but not in the MOONLiT cloud subset.

**Table S1. Median (interquartile range) and sample number (n) of Arctic Ocean ONLi cloud properties over sea ice, separated by altitude bins as classified by the criteria in Table 1 and by radar reflectivity above and below detection limit (DL, -29 dBZ). Red (grey) color indicates significant (not significant) differences compared to clean background clouds, as determined at 95% confidence using a permutation test.**

| Attribute                             | Reflectivity | Clean, < 1.1 km        | n    | All clouds, < 1.1 km   | n    | Aerosol-impacted <sup>a</sup> , < 1.1 km | n   |
|---------------------------------------|--------------|------------------------|------|------------------------|------|------------------------------------------|-----|
| <i>Base T (°C)</i>                    | > DL         | -16.9 (-19.8 to -13.7) | 1063 | -18.4 (-21.7 to -14.8) | 4809 | -18.2 (-22.0 to -13.7)                   | 133 |
|                                       | < DL         | -14.5 (-16.7 to -10.0) | 135  | -17.5 (-20.6 to -13.3) | 1030 | -19.0 (-20.4 to -9.1)                    | 41  |
|                                       | All          | -16.5 (-19.6 to -13.0) | 1265 | -18.2 (-21.4 to -14.5) | 6126 | -18.1 (-21.4 to -14.5)                   | 180 |
| <i>Top T (°C)</i>                     | > DL         | -19.1 (-22.0 to -16.2) | 1063 | -20.1 (-23.0 to -16.8) | 4809 | -20.6 (-23.1 to -16.0)                   | 133 |
|                                       | < DL         | -15.3 (-18.3 to -11.0) | 135  | -18.4 (-20.9 to -14.6) | 1030 | -19.6 (-21.6 to -13.0)                   | 41  |
|                                       | All          | -18.7 (-21.7 to -15.3) | 1265 | -19.7 (-22.7 to -16.4) | 6126 | -19.8 (-22.4 to -15.7)                   | 180 |
| <i>Altitude, base (km)</i>            | > DL         | 0.76 (0.58-0.94)       | 1063 | 0.76 (0.58-0.94)       | 4809 | 0.82 (0.64-1.00)                         | 133 |
|                                       | < DL         | 0.76 (0.67-0.94)       | 135  | 0.82 (0.70-0.94)       | 1030 | 0.88 (0.70-1.00)                         | 41  |
|                                       | All          | 0.76 (0.58-0.94)       | 1265 | 0.76 (0.64-0.94)       | 6126 | 0.88 (0.64-1.00)                         | 180 |
| <i>Thickness (km)</i>                 | > DL         | 0.72 (0.60-1.08)       | 1063 | 0.72 (0.60-0.90)       | 4809 | 0.66 (0.54-0.90)                         | 133 |
|                                       | < DL         | 0.60 (0.48-0.72)       | 135  | 0.54 (0.48-0.72)       | 1030 | 0.60 (0.54-0.66)                         | 41  |
|                                       | All          | 0.72 (0.60-1.02)       | 1265 | 0.66 (0.54-0.84)       | 6126 | 0.66 (0.54-0.84)                         | 180 |
| <i>COD</i>                            | > DL         | 1.79 (0.96-2.58)       | 823  | 1.15 (0.68-1.96)       | 4277 | 1.05 (0.65-1.63)                         | 127 |
|                                       | < DL         | 1.07 (0.33-1.80)       | 111  | 0.79 (0.45-1.29)       | 978  | 0.70 (0.37-1.18)                         | 40  |
|                                       | All          | 1.63 (0.85-2.54)       | 994  | 1.05 (0.61-1.80)       | 5521 | 0.96 (0.52-1.55)                         | 172 |
| <i>Multi-layer clouds</i>             | > DL         | 67%                    | 1063 | 74%                    | 4809 | 84%                                      | 133 |
|                                       | < DL         | 71%                    | 135  | 77%                    | 1030 | 85%                                      | 41  |
|                                       | All          | 68%                    | 1265 | 75%                    | 6126 | 85%                                      | 180 |
| <i>BC at base (ng m<sup>-3</sup>)</i> | > DL         | 15 (9-20)              | 1063 | 27 (13-55)             | 4809 | 56 (40-90)                               | 133 |
|                                       | < DL         | 13 (8-20)              | 135  | 24 (11-48)             | 1030 | 43 (36-62)                               | 41  |
|                                       | All          | 14 (9-20)              | 1265 | 26 (13-54)             | 6126 | 53 (38-86)                               | 180 |
| <i>% &lt; CloudSat DL<sup>b</sup></i> | All          | 15%                    | 651  | 22%                    | 3328 | 30%                                      | 111 |
| <i>% Mixed-phase<sup>b</sup></i>      | > DL         | 90%                    | 501  | 87%                    | 2355 | 86%                                      | 70  |
| <i>% precipitating<sup>b,c</sup></i>  | > DL         | 17%                    | 621  | 12%                    | 2695 | 14%                                      | 78  |
| <i>r<sub>e</sub> (μm)<sup>b</sup></i> | > DL         | 10.0 (9.2-11.0)        | 503  | 9.9 (9.1-10.9)         | 2286 | 10.4 (9.3-11.3)                          | 71  |
| <i>Reflectivity (dBZ)<sup>b</sup></i> | > DL         | -21.4 (-24.7 to -18.2) | 553  | -22.0 (-25.5 to -18.5) | 2593 | -20.3 (-24.5 to -16.5)                   | 78  |

Continued on next page...

| Attribute                             | Reflectivity | Clean, $\geq 1.1$ km   | n    | All clouds, $\geq 1.1$ km | n     | Aerosol-impacted <sup>a</sup> , $\geq 1.1$ km | n    |
|---------------------------------------|--------------|------------------------|------|---------------------------|-------|-----------------------------------------------|------|
| <i>Base T (°C)</i>                    | > DL         | -19.2 (-22.1 to -16.5) | 4741 | -19.5 (-22.4 to -16.5)    | 14695 | -19.5 (23.3 to -15.2)                         | 667  |
|                                       | < DL         | -19.2 (-23.0 to -15.7) | 762  | -18.7 (-21.9 to -15.6)    | 3564  | -18.4 (-22.2 to -15.3)                        | 350  |
|                                       | All          | -19.2 (-22.2 to -16.4) | 5710 | -19.3 (-22.4 to -16.3)    | 19014 | -18.9 (-22.8 to -15.1)                        | 1081 |
| <i>Top T (°C)</i>                     | > DL         | -24.7 (-28.4 to -21.5) | 4741 | -24.4 (-28.0 to -20.8)    | 14695 | -23.9 (-27.7 to -19.6)                        | 667  |
|                                       | < DL         | -22.3 (-26.5 to -19.0) | 762  | -21.8 (-25.1 to -18.6)    | 3564  | -21.7 (-24.8 to -18.7)                        | 350  |
|                                       | All          | -24.3 (-28.2 to -21.0) | 5710 | -23.8 (-27.5 to -20.1)    | 19014 | -22.8 (-27.0 to -19.0)                        | 1081 |
| <i>Altitude, base (km)</i>            | > DL         | 1.96 (1.54-2.50)       | 4741 | 1.84 (1.48-2.44)          | 14695 | 1.96 (1.54-2.56)                              | 667  |
|                                       | < DL         | 2.26 (1.78-2.98)       | 762  | 2.02 (1.54-2.68)          | 3564  | 2.20 (1.54-2.68)                              | 350  |
|                                       | All          | 1.96 (1.54-2.56)       | 5710 | 1.90 (1.48-2.50)          | 19014 | 2.02 (1.54-2.62)                              | 1081 |
| <i>Thickness (km)</i>                 | > DL         | 1.08 (0.66-1.32)       | 4741 | 0.84 (0.60-1.20)          | 14695 | 0.72 (0.60-0.96)                              | 667  |
|                                       | < DL         | 0.60 (0.48-0.72)       | 762  | 0.60 (0.48-0.66)          | 3564  | 0.54 (0.48-0.66)                              | 350  |
|                                       | All          | 0.96 (0.66-1.26)       | 5710 | 0.72 (0.60-1.14)          | 19014 | 0.66 (0.54-0.84)                              | 1081 |
| <i>COD</i>                            | > DL         | 1.04 (0.61-1.63)       | 3337 | 0.95 (0.58-1.54)          | 11957 | 0.82 (0.51-1.54)                              | 645  |
|                                       | < DL         | 0.52 (0.30-1.02)       | 705  | 0.58 (0.35-1.01)          | 3394  | 0.52 (0.33-0.84)                              | 347  |
|                                       | All          | 0.95 (0.53-1.55)       | 4201 | 0.85 (0.50-1.43)          | 16012 | 0.70 (0.41-1.08)                              | 1055 |
| <i>Multi-layer clouds</i>             | > DL         | 77%                    | 4741 | 80%                       | 14695 | 92%                                           | 667  |
|                                       | < DL         | 87%                    | 762  | 88%                       | 3564  | 96%                                           | 350  |
|                                       | All          | 79%                    | 5710 | 82%                       | 19014 | 94%                                           | 1081 |
| <i>BC at base (ng m<sup>-3</sup>)</i> | > DL         | 15 (10-21)             | 4741 | 26 (14-53)                | 14695 | 60 (43-94)                                    | 667  |
|                                       | < DL         | 16 (11-21)             | 762  | 25 (14-48)                | 3564  | 56 (39-95)                                    | 350  |
|                                       | All          | 15 (10-21)             | 5710 | 25 (14-52)                | 19014 | 59 (41-94)                                    | 1081 |
| <i>% &lt; CloudSat DL<sup>b</sup></i> | All          | 14%                    | 5543 | 21%                       | 18513 | 37%                                           | 1052 |
| <i>% Mixed-phase<sup>b</sup></i>      | > DL         | 96%                    | 4294 | 94%                       | 13343 | 92%                                           | 611  |
| <i>% precipitating<sup>b,c</sup></i>  | > DL         | 18%                    | 5295 | 13%                       | 15430 | 11%                                           | 659  |
| <i>r<sub>e</sub> (μm)<sup>b</sup></i> | > DL         | 10.3 (9.4-11.3)        | 4414 | 10.1 (9.2-11.1)           | 13128 | 9.8 (9.0-10.6)                                | 579  |
| <i>Reflectivity (dBZ)<sup>b</sup></i> | > DL         | -20.3 (-24.3 to -16.5) | 4741 | -21.5 (-25.2 to -17.4)    | 4741  | -22.9 (-26.4 to -19.3)                        | 667  |

<sup>a</sup>Aerosol-impacted, as determined in the third column of Table 1.

<sup>b</sup>For clouds with bases >750 m asl

<sup>c</sup>Precipitating clouds were included in this metric only.

**Table S2. Median (interquartile range) of Arctic Ocean ONLi cloud properties over open ocean, separated by altitude bins as classified by the criteria in Table 1. Red (grey) color indicates significant (not significant) differences compared to clean background clouds, as determined at 95% confidence using a permutation test.**

| Attribute                             | Reflectivity | Clean, < 1.1 km        | n    | All clouds, < 1.1 km   | n    | Aerosol-impacted <sup>a</sup> , < 1.1 km | n   |
|---------------------------------------|--------------|------------------------|------|------------------------|------|------------------------------------------|-----|
| <i>Base T (°C)</i>                    | > DL         | -6.1 (-9.7 to -2.0)    | 722  | -5.6 (-9.3 to -1.0)    | 2592 | -7.6 (-11.6 to -4.8)                     | 47  |
|                                       | < DL         | -4.2 (-7.0 to 0.9)     | 247  | -3.6 (-6.4 to 0.6)     | 1100 | -4.5 (-6.2 to -0.9)                      | 27  |
|                                       | All          | -5.4 (-8.8 to -1.0)    | 1047 | -4.9 (-8.3 to -0.2)    | 3975 | -6.4 (-9.2 to -3.5)                      | 77  |
| <i>Top T (°C)</i>                     | > DL         | -10.6 (-15.5 to -6.2)  | 722  | -10.5 (-15.1 to -5.3)  | 2592 | -13.7 (-21.6 to -9.8)                    | 47  |
|                                       | < DL         | -7.2 (-10.0 to -1.1)   | 247  | -6.9 (-10.0 to -2.0)   | 1100 | -6.9 (-9.1 to -2.2)                      | 27  |
|                                       | All          | -9.4 (-13.5 to -4.0)   | 1047 | -8.8 (-13.0 to -3.7)   | 3975 | -11.3 (-16.1 to -6.9)                    | 77  |
| <i>Altitude, base (km)</i>            | > DL         | 0.70 (0.58-0.88)       | 722  | 0.70 (0.58-0.88)       | 2592 | 0.82 (0.67-1.00)                         | 47  |
|                                       | < DL         | 0.82 (0.70-1.00)       | 247  | 0.82 (0.70-1.00)       | 1100 | 0.88 (0.79-1.00)                         | 27  |
|                                       | All          | 0.76 (0.58-0.94)       | 1047 | 0.76 (0.58-0.94)       | 3975 | 0.88 (0.70-1.00)                         | 77  |
| <i>Thickness (km)</i>                 | > DL         | 0.72 (0.54-0.96)       | 722  | 0.75 (0.60-1.02)       | 2592 | 0.90 (0.66-1.38)                         | 47  |
|                                       | < DL         | 0.60 (0.36-0.72)       | 247  | 0.60 (0.48-0.72)       | 1100 | 0.60 (0.42-0.72)                         | 27  |
|                                       | All          | 0.66 (0.42-0.84)       | 1047 | 0.66 (0.54-1.14)       | 3975 | 0.72 (0.54-1.14)                         | 77  |
| <i>COD</i>                            | > DL         | 1.13 (0.15-2.52)       | 612  | 1.24 (0.37-2.25)       | 2302 | 1.01 (0.61-1.53)                         | 45  |
|                                       | < DL         | 0.52 (0.09-2.01)       | 210  | 1.08 (0.26-1.96)       | 1001 | 1.08 (0.25-1.93)                         | 25  |
|                                       | All          | 0.91 (0.11-2.47)       | 898  | 1.13 (0.27-2.08)       | 3569 | 1.01 (0.35-1.66)                         | 114 |
| <i>Multi-layer clouds</i>             | > DL         | 78%                    | 722  | 79%                    | 2592 | 77%                                      | 47  |
|                                       | < DL         | 83%                    | 247  | 83%                    | 1100 | 85%                                      | 27  |
|                                       | All          | 80%                    | 1047 | 80%                    | 3975 | 79%                                      | 77  |
| <i>BC at base (ng m<sup>-3</sup>)</i> | > DL         | 11 (7-18)              | 722  | 16 (8-34)              | 2592 | 51 (39-93)                               | 47  |
|                                       | < DL         | 12 (7-19)              | 247  | 16 (8-33)              | 1100 | 73 (43-109)                              | 27  |
|                                       | All          | 11 (7-18)              | 1047 | 16 (8-34)              | 3975 | 63 (39-109)                              | 77  |
| <i>% &lt; CloudSat DL<sup>b</sup></i> | All          | 38%                    | 538  | 42%                    | 2171 | 42%                                      | 55  |
| <i>% Mixed-phase<sup>b</sup></i>      | > DL         | 62%                    | 287  | 60%                    | 1052 | 67%                                      | 24  |
| <i>% precipitating<sup>b,c</sup></i>  | > DL         | 11%                    | 325  | 13%                    | 1224 | 22%                                      | 27  |
| <i>r<sub>e</sub> (μm)<sup>b</sup></i> | > DL         | 10.3 (9.3-11.6)        | 237  | 10.2 (9.2-11.6)        | 924  | 10.2 (9.8-11.9)                          | 22  |
| <i>Reflectivity (dBZ)<sup>b</sup></i> | > DL         | -22.3 (-26.3 to -17.4) | 336  | -22.5 (-26.3 to -17.4) | 1265 | -21.6 (-27.5 to -17.0)                   | 32  |

*Continued on next page...*

| Attribute                             | Reflectivity | Clean, 1.1-3.2 km      | n    | All clouds, 1.1-3.2 km | n    | Aerosol-impacted <sup>a</sup> , 1.1-3.2 km | n   |
|---------------------------------------|--------------|------------------------|------|------------------------|------|--------------------------------------------|-----|
| <i>Base T (°C)</i>                    | > DL         | -11.4 (-16.8 to -7.3)  | 1511 | -11.1 (-16.0 to -7.1)  | 5293 | -12.5 (-16.8 to -8.2)                      | 305 |
|                                       | < DL         | -6.4 (-12.4 to -1.2)   | 803  | -6.4 (-12.8 to -1.9)   | 3601 | -9.1 (-15.3 to -4.6)                       | 240 |
|                                       | All          | -9.5 (-15.5 to -4.7)   | 2439 | -9.0 (-14.9 to -4.4)   | 9417 | -11.2 (-15.9 to -6.2)                      | 581 |
| <i>Top T (°C)</i>                     | > DL         | -18.2 (-23.8 to -12.3) | 1511 | -16.3 (-22.3 to -12.0) | 5293 | -18.7 (-23.7 to -13.5)                     | 305 |
|                                       | < DL         | -9.4 (-16.4 to -4.9)   | 803  | -9.6 (-16.6 to -4.9)   | 3601 | -12.0 (-19.4 to -8.0)                      | 240 |
|                                       | All          | -14.6 (-21.8 to -9.8)  | 2439 | -13.6 (-20.2 to -8.0)  | 9417 | -15.9 (-21.5 to -9.8)                      | 581 |
| <i>Altitude, base (km)</i>            | > DL         | 2.26 (1.66-2.80)       | 1511 | 2.14 (1.54-2.68)       | 5293 | 2.20 (1.60-2.74)                           | 305 |
|                                       | < DL         | 2.02 (1.54-2.62)       | 803  | 1.96 (1.48-2.62)       | 3601 | 2.08 (1.54-2.58)                           | 240 |
|                                       | All          | 2.14 (1.60-2.74)       | 2439 | 2.02 (1.54-2.56)       | 9417 | 2.08 (1.54-2.68)                           | 581 |
| <i>Thickness (km)</i>                 | > DL         | 0.84 (0.60-1.38)       | 1511 | 0.72 (0.60-1.14)       | 5293 | 0.72 (0.60-1.14)                           | 305 |
|                                       | < DL         | 0.60 (0.42-0.72)       | 803  | 0.60 (0.48-0.72)       | 3601 | 0.60 (0.48-0.72)                           | 240 |
|                                       | All          | 0.66 (0.54-0.84)       | 2439 | 0.66 (0.54-0.90)       | 9417 | 0.66 (0.54-0.84)                           | 581 |
| <i>COD</i>                            | > DL         | 0.92 (0.44-1.62)       | 1342 | 0.93 (0.47-1.53)       | 4913 | 0.85 (0.47-1.31)                           | 288 |
|                                       | < DL         | 0.57 (0.22-1.26)       | 738  | 0.65 (0.28-1.22)       | 3414 | 0.67 (0.35-1.14)                           | 237 |
|                                       | All          | 0.76 (0.30-1.48)       | 2198 | 0.79 (0.36-1.402)      | 8831 | 0.75 (0.37-1.22)                           | 560 |
| <i>Multi-layer clouds</i>             | > DL         | 89%                    | 1511 | 89%                    | 5293 | 95%                                        | 305 |
|                                       | < DL         | 91%                    | 803  | 92%                    | 3601 | 96%                                        | 240 |
|                                       | All          | 90%                    | 2439 | 91%                    | 9417 | 96%                                        | 581 |
| <i>BC at base (ng m<sup>-3</sup>)</i> | > DL         | 13 (8-19)              | 1511 | 19 (10-44)             | 5293 | 65 (46-102)                                | 305 |
|                                       | < DL         | 12 (7-18)              | 803  | 18 (10-45)             | 3601 | 67 (45-114)                                | 240 |
|                                       | All          | 13 (8-19)              | 2439 | 19 (10-45)             | 9417 | 66 (45-107)                                | 581 |
| <i>% &lt; CloudSat DL<sup>b</sup></i> | All          | 38%                    | 2423 | 43%                    | 9353 | 47%                                        | 574 |
| <i>% Mixed-phase<sup>b</sup></i>      | > DL         | 81%                    | 1240 | 78%                    | 4281 | 78%                                        | 269 |
| <i>% precipitating<sup>b,c</sup></i>  | > DL         | 7%                     | 1350 | 7%                     | 4610 | 5%                                         | 287 |
| <i>r<sub>e</sub> (μm)<sup>b</sup></i> | > DL         | 10.1 (9.2-11.3)        | 1168 | 10.1 (9.1-11.3)        | 4058 | 9.7 (9.0-10.9)                             | 225 |
| <i>Reflectivity (dBZ)<sup>b</sup></i> | > DL         | -21.3 (-25.6 to -16.4) | 1510 | -22.1 (-26.2 to -16.8) | 5285 | -23.5 (-26.6 to -19.0)                     | 305 |

Continued on next page...

| Attribute                             | Reflectivity | Clean, > 3.2 km        | n    | All clouds, > 3.2 km          | n           | Aerosol-impacted <sup>a</sup> , >3.2 km | n          |
|---------------------------------------|--------------|------------------------|------|-------------------------------|-------------|-----------------------------------------|------------|
| <i>Base T (°C)</i>                    | > DL         | -18.1 (-21.5 to -13.6) | 1448 | -17.8 (-21.3 to -13.1)        | 3454        | -18.4 (-22.0 to -13.2)                  | 135        |
|                                       | < DL         | -17.9 (-21.5 to -13.4) | 498  | -17.2 (-21.3 to -12.8)        | 1505        | -17.3 (-21.3 to -12.8)                  | 79         |
|                                       | All          | -18.0 (-21.4 to -13.5) | 2001 | <b>-17.6 (-21.3 to -12.9)</b> | <b>5107</b> | -18.0 (-22.6 to -13.0)                  | 221        |
| <i>Top T (°C)</i>                     | > DL         | -25.2 (-28.9 to -21.0) | 1448 | <b>-24.3 (-28.3 to -19.9)</b> | <b>3454</b> | <b>-22.9 (-27.0 to -18.8)</b>           | <b>135</b> |
|                                       | < DL         | -22.5 (-26.6 to -18.2) | 498  | <b>-21.6 (-25.6 to -17.2)</b> | <b>1505</b> | -21.1 (-26.5 to -15.3)                  | 79         |
|                                       | All          | -23.9 (-28.2 to -20.0) | 2001 | <b>-23.3 (-27.5 to -18.7)</b> | <b>5107</b> | <b>-22.6 (-26.7 to -18.2)</b>           | <b>221</b> |
| <i>Altitude, base (km)</i>            | > DL         | 4.00 (3.52-4.66)       | 1448 | 3.94 (3.52-4.60)              | 3454        | <b>3.70 (3.40-4.06)</b>                 | <b>135</b> |
|                                       | < DL         | 4.12 (3.64-4.84)       | 498  | <b>4.06 (3.58-4.66)</b>       | <b>1505</b> | <b>3.76 (3.46-4.33)</b>                 | <b>79</b>  |
|                                       | All          | 4.00 (3.52-4.72)       | 2001 | 4.00 (3.52-4.60)              | 5107        | <b>3.70 (3.46-4.18)</b>                 | <b>221</b> |
| <i>Thickness (km)</i>                 | > DL         | 0.90 (0.66-1.32)       | 1448 | <b>0.84 (0.66-1.20)</b>       | <b>3454</b> | <b>0.72 (0.60-0.84)</b>                 | <b>135</b> |
|                                       | < DL         | 0.66 (0.54-0.78)       | 498  | <b>0.60 (0.54-0.72)</b>       | <b>1505</b> | <b>0.60 (0.54-0.66)</b>                 | <b>79</b>  |
|                                       | All          | 0.78 (0.60-1.20)       | 2001 | <b>0.72 (0.60-1.08)</b>       | <b>5107</b> | <b>0.66 (0.54-0.78)</b>                 | <b>221</b> |
| <i>COD</i>                            | > DL         | 0.72 (0.41-1.14)       | 1332 | 0.72 (0.43-1.12)              | 3259        | 0.71 (0.48-1.02)                        | 130        |
|                                       | < DL         | 0.41 (0.27-0.73)       | 479  | 0.47 (0.30-0.79)              | 1470        | 0.41 (0.32-0.70)                        | 77         |
|                                       | All          | 0.63 (0.43-1.03)       | 1856 | 0.63 (0.36-1.02)              | 4865        | 0.62 (0.37-0.89)                        | 214        |
| <i>Multi-layer clouds</i>             | > DL         | 96%                    | 1448 | 95%                           | 3454        | 97%                                     | 135        |
|                                       | < DL         | 98%                    | 498  | <b>96%</b>                    | <b>1505</b> | 99%                                     | 79         |
|                                       | All          | 97%                    | 2001 | <b>95%</b>                    | <b>5107</b> | 98%                                     | 221        |
| <i>BC at base (ng m<sup>-3</sup>)</i> | > DL         | 15 (10-21)             | 1448 | <b>18 (11-29)</b>             | <b>3454</b> | <b>49 (35-76)</b>                       | <b>135</b> |
|                                       | < DL         | 15 (9-21)              | 498  | <b>18 (11-29)</b>             | <b>1505</b> | <b>38 (32-65)</b>                       | <b>79</b>  |
|                                       | All          | 15 (10-21)             | 2001 | <b>18 (11-29)</b>             | <b>5107</b> | <b>42 (34-73)</b>                       | <b>221</b> |
| <i>% &lt; CloudSat DL<sup>b</sup></i> | All          | 27%                    | 1989 | <b>32%</b>                    | <b>5088</b> | <b>39%</b>                              | <b>221</b> |
| <i>% Mixed-phase<sup>b</sup></i>      | > DL         | 90%                    | 1151 | 88%                           | 2727        | 88%                                     | 112        |
| <i>% precipitating<sup>b,c</sup></i>  | > DL         | 6%                     | 1235 | 5%                            | 2894        | 8%                                      | 119        |
| <i>r<sub>c</sub> (μm)<sup>b</sup></i> | > DL         | 9.9 (9.1-10.9)         | 1116 | 9.8 (9.1-10.8)                | 2669        | <b>9.5 (9.0-10.5)</b>                   | <b>108</b> |
| <i>Reflectivity (dBZ)<sup>b</sup></i> | > DL         | -22.3 (-26.0 to -17.9) | 1448 | <b>-23.0 (-26.4 to -18.5)</b> | <b>3453</b> | <b>-24.2 (-26.8 to -20.9)</b>           | <b>135</b> |

<sup>a</sup>Aerosol-impacted, as determined in the third column of Table 1.

<sup>b</sup>For clouds with bases >750 m asl

<sup>c</sup>Precipitating clouds were included in this metric only.

**Table S3: Median (interquartile range) of Arctic Ocean MOONLiT cloud properties as classified by the criteria in Table 1, separated by reflectivity above and below detection limit (DL, -29 dBZ) and surface regime. Red (grey) color indicates significant (not significant) differences compared to clean background clouds, as determined at 95% confidence using a permutation test. Blue indicates that significance was lost<sup>c</sup> with altitude binning (relevant only to the open ocean cases).**

| Attribute                             | Zm   | Sea ice                |      |                        |      |                               |     | Open ocean             |     |                        |      |                               |     |
|---------------------------------------|------|------------------------|------|------------------------|------|-------------------------------|-----|------------------------|-----|------------------------|------|-------------------------------|-----|
|                                       |      | Clean background       | n    | All clouds             | n    | Aerosol-impacted <sup>a</sup> | n   | Background             | n   | All                    | n    | Aerosol-impacted <sup>a</sup> | n   |
| <i>Base T (°C)</i>                    | > DL | -19.4 (-22.2 to -17.0) | 1349 | -19.9 (-22.6 to -17.4) | 4462 | -20.1 (-23.5 to -17.7)        | 197 | -16.6 (-19.7 to -10.4) | 368 | -14.4 (-19.1 to -9.4)  | 1731 | -14.1 (-19.4 to -8.8)         | 125 |
|                                       | < DL | -21.7 (-24.7 to -18.2) | 196  | -19.8 (-23.1 to -16.6) | 987  | -18.7 (-22.8 to -16.0)        | 101 | -14.7 (-19.5 to -7.6)  | 183 | -10.2 (-17.9 to -4.7)  | 1046 | -13.0 (-17.0 to -3.7)         | 89  |
|                                       | All  | -19.6 (-22.5 to -17.2) | 1604 | -19.9 (-22.7 to -17.3) | 5691 | -19.8 (-23.3 to -17.1)        | 314 | -16.1 (-19.7 to -9.6)  | 571 | -13.4 (-18.5 to -7.5)  | 2919 | -13.2 (-17.9 to -7.0)         | 223 |
| <i>Top T (°C)</i>                     | > DL | -26.1 (-29.0 to -22.9) | 1349 | -25.9 (-28.6 to -22.5) | 4462 | -25.3 (-28.9 to -22.0)        | 197 | -24.4 (-28.2 to -19.0) | 368 | -21.2 (-26.5 to -15.3) | 1731 | -19.8 (-25.6 to -14.3)        | 125 |
|                                       | < DL | -25.1 (-28.9 to -21.5) | 196  | -23.0 (-26.7 to -19.8) | 987  | -22.2 (-25.5 to -19.0)        | 101 | -18.6 (-24.0 to -10.7) | 183 | -14.5 (-22.0 to -8.1)  | 1046 | -15.9 (-21.1 to -7.6)         | 89  |
|                                       | All  | -26.0 (-29.0 to -22.8) | 1604 | -25.4 (-28.4 to -21.9) | 5691 | -24.2 (-28.4 to -20.2)        | 314 | -22.5 (-27.1 to -15.5) | 571 | -19.1 (-24.9 to -11.8) | 2919 | -18.0 (-23.5 to -11.5)        | 223 |
| <i>Altitude, base (km)</i>            | > DL | 1.84 (1.60-2.32)       | 1349 | 1.78 (1.54-2.26)       | 4462 | 1.84 (1.48-2.50)              | 197 | 3.28 (2.38-4.06)       | 368 | 2.68 (1.84-3.64)       | 1731 | 2.44 (1.72-3.40)              | 125 |
|                                       | < DL | 2.50 (1.90-3.30)       | 196  | 2.08 (1.60-2.74)       | 987  | 2.20 (1.72-2.92)              | 101 | 3.28 (2.14-4.21)       | 183 | 2.50 (1.78-3.58)       | 1046 | 2.50 (1.72-2.98)              | 89  |
|                                       | All  | 1.90 (1.60-2.50)       | 1604 | 1.84 (1.54-2.38)       | 5691 | 1.99 (1.54-2.62)              | 314 | 3.28 (2.29-4.09)       | 571 | 2.56 (1.78-3.58)       | 2919 | 2.38 (1.69-3.31)              | 223 |
| <i>Thickness (km)</i>                 | > DL | 1.20 (1.02-1.44)       | 1349 | 1.08 (0.72-1.32)       | 4462 | 0.78 (0.60-1.02)              | 197 | 1.14 (0.72-1.62)       | 368 | 0.84 (0.66-1.38)       | 1731 | 0.72 (0.66-1.08)              | 125 |
|                                       | < DL | 0.60 (0.48-0.72)       | 205  | 0.60 (0.48-0.72)       | 987  | 0.54 (0.48-0.66)              | 101 | 0.6 (0.4-0.7)          | 183 | 0.6 (0.5-0.7)          | 1049 | 0.6 (0.5-0.7)                 | 89  |
|                                       | All  | 1.20 (0.78-1.38)       | 1604 | 0.90 (0.60-1.26)       | 5691 | 0.66 (0.54-0.90)              | 314 | 0.78 (0.60-1.32)       | 571 | 0.72 (0.54-1.08)       | 2919 | 0.66 (0.54-0.90)              | 223 |
| <i>COD</i>                            | > DL | 1.03 (0.64-1.50)       | 813  | 1.01 (0.61-1.57)       | 3279 | 0.80 (0.53-1.34)              | 191 | 0.80 (0.43-1.39)       | 302 | 0.89 (0.50-1.54)       | 1554 | 0.70 (0.38-1.14)              | 116 |
|                                       | < DL | 0.40 (0.26-0.66)       | 186  | 0.56 (0.32-0.99)       | 939  | 0.46 (0.28-0.83)              | 100 | 0.30 (0.13-0.64)       | 181 | 0.51 (0.23-1.06)       | 1009 | 0.54 (0.29-1.11)              | 88  |
|                                       | All  | 0.92 (0.51-1.45)       | 1041 | 0.89 (0.51-1.47)       | 4427 | 0.72 (0.40-1.16)              | 307 | 0.61 (0.24-1.16)       | 503 | 0.73 (0.31-1.37)       | 2701 | 0.66 (0.33-1.11)              | 213 |
| <i>Multi-layer clouds</i>             | > DL | 39%                    | 1349 | 41%                    | 4462 | 69%                           | 197 | 76%                    | 368 | 71%                    | 1731 | 83%                           | 125 |
|                                       | < DL | 62%                    | 196  | 56%                    | 987  | 86%                           | 101 | 92%                    | 183 | 80%                    | 1046 | 90%                           | 89  |
|                                       | All  | 42%                    | 1604 | 44%                    | 5691 | 75%                           | 314 | 81%                    | 571 | 75%                    | 2919 | 86%                           | 223 |
| <i>BC at base (ng m<sup>-3</sup>)</i> | > DL | 15 (11-22)             | 1349 | 27 (14-53)             | 4462 | 56 (42-82)                    | 197 | 15 (11-21)             | 368 | 20 (11-38)             | 1731 | 62 (40-94)                    | 125 |
|                                       | < DL | 15 (11-20)             | 196  | 22 (13-42)             | 987  | 45 (38-80)                    | 101 | 13 (8-19)              | 183 | 19 (11-38)             | 1046 | 57 (40-94)                    | 89  |
|                                       | All  | 15 (11-22)             | 1604 | 26 (14-51)             | 5691 | 54 (39-81)                    | 314 | 14 (10-20)             | 571 | 19 (11-38)             | 2919 | 61 (40-94)                    | 223 |
| <i>% &lt; CloudSat DL</i>             | All  | 13%                    | 1557 | 19%                    | 5538 | 36%                           | 306 | 35%                    | 568 | 41%                    | 2913 | 44%                           | 223 |
| <i>% Mixed-phase</i>                  | > DL | 100%                   | 63   | 97%                    | 146  | 100%                          | 8   | 93%                    | 138 | 88%                    | 412  | 72%                           | 18  |
| <i>% precipitating<sup>b</sup></i>    | > DL | 20%                    | 1571 | 14%                    | 4811 | 8%                            | 196 | 10%                    | 383 | 8%                     | 1675 | 4%                            | 114 |
| <i>r<sub>e</sub> (μm)</i>             | > DL | 10.5 (9.7-11.4)        | 1178 | 10.3 (9.5-11.3)        | 3809 | 10.0 (9.4-11.1)               | 152 | 10.2 (9.4-11.2)        | 284 | 10.3 (9.4-11.4)        | 1211 | 10.0 (9.0-11.0)               | 78  |
| <i>Reflectivity (dBZ)</i>             | > DL | -19.6 (-23.6 to -17.3) | 1349 | -20.8 (-24.5 to -16.9) | 4462 | -22.2 (-25.6 to -18.8)        | 197 | -21.8 (-25.8 to -17.3) | 368 | -21.4 (-25.9 to -16.6) | 1729 | -23.4 (-26.8 to -16.9)        | 204 |

<sup>a</sup>Aerosol-impacted, as determined in the third column of Table 1.



<sup>b</sup>Precipitating clouds were included in this metric only.

**Table S4. Median (interquartile range) and sample number (n) of Arctic Ocean ONLi cloud properties over open ocean, separated by altitude bins as classified by the criteria in Table 1 and by radar reflectivity above and below detection limit (DL, -29 dBZ). Red (grey) color indicates significant (not significant) differences compared to clean background clouds, as determined at 95% confidence using a permutation test.**

| Attribute                             | Reflectivity | Clean, 1.1-3.2 km      | n   | All clouds, 1.1-3.2 km | n    | Aerosol-impacted <sup>a</sup> , 1.1-3.2 km | n   |
|---------------------------------------|--------------|------------------------|-----|------------------------|------|--------------------------------------------|-----|
| <i>Base T (°C)</i>                    | > DL         | -15.3 (-19.1 to -9.5)  | 176 | -12.5 (-17.1 to -8.2)  | 1113 | -11.8 (-16.6 to -8.0)                      | 89  |
|                                       | < DL         | -8.3 (-14.3 to -2.9)   | 89  | -7.0 (-13.6 to -2.3)   | 687  | -10.4 (-15.9 to -2.7)                      | 67  |
|                                       | All          | -12.8 (-18.0 to -6.4)  | 275 | -10.2 (-16.0 to -5.5)  | 1909 | -11.0 (-16.0 to -4.6)                      | 165 |
| <i>Top T (°C)</i>                     | > DL         | -22.3 (-26.5 to -15.5) | 176 | -18.8 (-24.7 to -13.5) | 1113 | -18.9 (-24.7 to -13.5)                     | 89  |
|                                       | < DL         | -11.6 (-17.8 to -6.6)  | 89  | -10.6 (-17.5 to -5.7)  | 687  | -12.4 (-18.5 to -4.4)                      | 67  |
|                                       | All          | -18.9 (-25.6 to -11.4) | 275 | -15.6 (-22.1 to -9.5)  | 1909 | -16.2 (-22.1 to -9.0)                      | 165 |
| <i>Altitude, base (km)</i>            | > DL         | 2.35 (1.90-2.92)       | 176 | 2.08 (1.54-2.62)       | 1113 | 2.02 (1.48-2.50)                           | 89  |
|                                       | < DL         | 2.14 (1.84-2.68)       | 89  | 1.96 (1.48-2.50)       | 687  | 2.02 (1.57-2.68)                           | 67  |
|                                       | All          | 2.26 (1.90-2.86)       | 275 | 2.02 (1.54-2.56)       | 1909 | 2.02 (1.54-2.56)                           | 165 |
| <i>Thickness (km)</i>                 | > DL         | 1.20 (0.72-1.62)       | 176 | 0.84 (0.66-1.38)       | 1113 | 0.78 (0.66-1.20)                           | 89  |
|                                       | < DL         | 0.54 (0.42-0.72)       | 89  | 0.60 (0.48-0.75)       | 687  | 0.60 (0.51-0.78)                           | 67  |
|                                       | All          | 0.78 (0.60-1.35)       | 275 | 0.72 (0.54-1.08)       | 1909 | 0.66 (0.60-1.02)                           | 165 |
| <i>COD</i>                            | > DL         | 1.04 (0.65-1.63)       | 144 | 1.08 (0.57-1.74)       | 994  | 0.78 (0.37-1.37)                           | 82  |
|                                       | < DL         | 0.35 (0.12-0.90)       | 89  | 0.63 (0.24-1.28)       | 687  | 0.80 (0.37-1.45)                           | 67  |
|                                       | All          | 0.82 (0.29-1.46)       | 275 | 0.86 (0.29-1.46)       | 1909 | 0.86 (0.36-1.37)                           | 165 |
| <i>Multi-layer clouds</i>             | > DL         | 64%                    | 176 | 63%                    | 1113 | 79%                                        | 89  |
|                                       | < DL         | 84%                    | 89  | 76%                    | 687  | 87%                                        | 67  |
|                                       | All          | 71%                    | 275 | 68%                    | 1909 | 82%                                        | 165 |
| <i>BC at base (ng m<sup>-3</sup>)</i> | > DL         | 16 (10-20)             | 176 | 22 (12-50)             | 1113 | 66 (46-101)                                | 89  |
|                                       | < DL         | 11 (7-16)              | 89  | 19 (10-49)             | 687  | 58 (44-98)                                 | 67  |
|                                       | All          | 14 (9-19)              | 275 | 21 (11-50)             | 1909 | 63 (45-100)                                | 165 |
| <i>% &lt; CloudSat DL</i>             | All          | 35%                    | 272 | 42%                    | 1904 | 46%                                        | 165 |
| <i>% Mixed-phase</i>                  | > DL         | 85%                    | 13  | 89%                    | 63   | 100%                                       | 2   |
| <i>% precipitating<sup>b</sup></i>    | > DL         | 12%                    | 193 | 10%                    | 1103 | 11%                                        | 87  |
| <i>r<sub>e</sub> (μm)</i>             | > DL         | 10.3 (9.6-11.3)        | 148 | 10.3 (9.4-11.4)        | 831  | 10.1 (9.0-11.2)                            | 60  |
| <i>Reflectivity (dBZ)</i>             | > DL         | -21.2 (-25.3 to -16.8) | 176 | -20.9 (-25.5 to -15.9) | 1111 | -22.1 (-27.4 to -16.1)                     | 89  |

*Continued on next page...*

| Attribute                             | Reflectivity | Clean, > 3.2 km        | n   | All clouds, > 3.2 1.1 km | n           | Aerosol-impacted <sup>a</sup> , >3.2 km | n         |
|---------------------------------------|--------------|------------------------|-----|--------------------------|-------------|-----------------------------------------|-----------|
| <i>Base T (°C)</i>                    | > DL         | -17.6 (-21.5 to -11.7) | 192 | -17.6 (-21.1 to -12.6)   | 617         | -18.8 (-24.0 to -13.4)                  | 36        |
|                                       | < DL         | -18.6 (-22.2 to -15.2) | 94  | -18.4 (-22.0 to -14.3)   | 358         | -17.4 (-21.8 to -14.3)                  | 22        |
|                                       | All          | -18.2 (-21.8 to -12.4) | 296 | -18.0 (-21.4 to -13.0)   | 1008        | -18.1 (-22.7 to -13.2)                  | 58        |
| <i>Top T (°C)</i>                     | > DL         | -25.7 (-29.4 to -21.2) | 192 | -24.6 (-28.8 to -20.5)   | 617         | -23.8 (-29.1 to -18.7)                  | 36        |
|                                       | < DL         | -22.8 (-26.7 to -19.0) | 94  | -22.8 (-26.7 to -17.8)   | 358         | -21.0 (-25.6 to -10.8)                  | 22        |
|                                       | All          | -24.5 (-28.6 to -20.4) | 296 | -23.8 (-28.2 to -19.4)   | 1008        | <b>-22.8 (-27.0 to -17.5)</b>           | <b>58</b> |
| <i>Altitude, base (km)</i>            | > DL         | 4.00 (3.52-4.54)       | 192 | 4.06 (3.52-4.60)         | 617         | 4.06 (3.64-4.26)                        | 36        |
|                                       | < DL         | 4.15 (3.64-4.76)       | 94  | 4.06 (3.58-4.60)         | 358         | 3.76 (3.46-4.26)                        | 22        |
|                                       | All          | 4.06 (3.58-4.60)       | 296 | 4.06 (3.58-4.66)         | 1008        | 3.97 (3.52-4.29)                        | 58        |
| <i>Thickness (km)</i>                 | > DL         | 1.08 (0.72-1.62)       | 192 | <b>0.90 (0.66-1.44)</b>  | <b>617</b>  | <b>0.69 (0.60-0.91)</b>                 | <b>36</b> |
|                                       | < DL         | 0.60 (0.48-0.72)       | 94  | 0.60 (0.48-0.72)         | 358         | 0.54 (0.49-0.60)                        | 22        |
|                                       | All          | 0.78 (0.60-1.32)       | 296 | <b>0.72 (0.54-1.14)</b>  | <b>1008</b> | <b>0.60 (0.54-0.84)</b>                 | <b>58</b> |
| <i>COD</i>                            | > DL         | 0.62 (0.30-1.12)       | 158 | 0.70 (0.38-1.17)         | 559         | 0.62 (0.43-0.86)                        | 34        |
|                                       | < DL         | 0.29 (0.14-0.57)       | 94  | <b>0.37 (0.22-0.68)</b>  | <b>354</b>  | 0.33 (0.24-0.47)                        | 22        |
|                                       | All          | 0.50 (0.23-0.83)       | 262 | <b>0.56 (0.26-0.99)</b>  | <b>946</b>  | 0.48 (0.25-0.73)                        | 56        |
| <i>Multi-layer clouds</i>             | > DL         | 86%                    | 192 | 85%                      | 617         | 94%                                     | 36        |
|                                       | < DL         | 99%                    | 94  | 87%                      | 358         | 100%                                    | 22        |
|                                       | All          | 91%                    | 296 | <b>86%</b>               | <b>1008</b> | 97%                                     | 58        |
| <i>BC at base (ng m<sup>-3</sup>)</i> | > DL         | 14 (11-22)             | 192 | <b>17 (11-28)</b>        | <b>617</b>  | <b>43 (35-86)</b>                       | <b>36</b> |
|                                       | < DL         | 14 (9-20)              | 94  | <b>18 (11-29)</b>        | <b>358</b>  | <b>42 (36-65)</b>                       | <b>22</b> |
|                                       | All          | 14 (11-21)             | 296 | <b>17 (11-28)</b>        | <b>1008</b> | <b>43 (35-74)</b>                       | <b>58</b> |
| <i>% &lt; CloudSat DL</i>             | All          | 35%                    | 296 | 39%                      | 1007        | 38%                                     | 58        |
| <i>% Mixed-phase</i>                  | > DL         | 94%                    | 125 | 88%                      | 349         | <b>69%</b>                              | <b>16</b> |
| <i>% precipitating<sup>b</sup></i>    | > DL         | 7%                     | 190 | 6%                       | 571         | 4%                                      | 27        |
| <i>r<sub>e</sub> (μm)</i>             | > DL         | 10.0 (9.2-11.0)        | 141 | 10.1 (9.2-11.1)          | 421         | 9.6 (9.0-10.6)                          | 20        |
| <i>Reflectivity (dBZ)</i>             | > DL         | -22.4 (-26.1 to -17.9) | 192 | -22.4 (-26.5 to -17.9)   | 617         | -24.6 (-26.1 to -19.9)                  | 36        |

<sup>a</sup>Aerosol-impacted, as determined in the third column of Table 1.

<sup>b</sup>Precipitating clouds were included in this metric only.
